1 Contribution of noncanonical antigens to virulence and adaptive immunity in human infection with  
2 enterotoxigenic *E. coli*

3

4 Kuhlmann FM<sup>1</sup>, Laine RO<sup>1</sup>, Afrin S<sup>1</sup>, Nakajima R<sup>2</sup>, Akhtar M<sup>3</sup>, Vickers T<sup>1</sup>, Parker K<sup>1†</sup>, Nizam NN<sup>3</sup>, Grigura  
5 V<sup>1</sup>, Goss CW<sup>4</sup>, Felgner PL<sup>2</sup>, Rasko DA<sup>5</sup>, Qadri F<sup>3</sup>, and Fleckenstein, JM<sup>1,6</sup>.

6

7 <sup>1</sup>Department of Internal Medicine, Division of Infectious Diseases, Washington University, St. Louis,  
8 Missouri, United States of America

9 <sup>2</sup>Vaccine R & D Center, University of California, Irvine, Irvine, CA, USA

10 <sup>3</sup>Infectious Diseases Division, International Centre for Diarrhoeal Disease Research, Bangladesh  
11 (icddr,b), Dhaka, Bangladesh

12 <sup>4</sup>Division of Biostatistics, Washington University, St. Louis, Missouri, United States of America

13 <sup>5</sup>Department of Microbiology and Immunology and Institute for Genome Sciences, University of  
14 Maryland School of Medicine, Baltimore, Maryland, United States of America

15 <sup>6</sup>Medicine Service, Veterans Affairs Medical Center, St. Louis, Missouri, United States of America

16 † current author address:

17 Corresponding Author:

18 James M. Fleckenstein

19 Washington University School of Medicine

20 Department of Medicine, Division of Infectious Diseases

21 660 S. Euclid Drive, Box 8051

22 Saint Louis, Missouri, USA 63110

23 [jfleckenstein@wustl.edu](mailto:jfleckenstein@wustl.edu)

24

25 **Abstract**

26 Enterotoxigenic *E. coli* (ETEC) contribute significantly to the substantial burden of infectious diarrhea  
27 among children living in low and middle income countries. In the absence of a vaccine for ETEC,  
28 children succumb to acute dehydration as well as non-diarrheal sequelae related to these infections  
29 including malnutrition. The considerable diversity of ETEC genomes has complicated canonical vaccine  
30 development approaches focused on a subset of antigens known as colonization factors (CFs). To  
31 identify additional conserved immunogens, we mined genomic sequences of 89 ETEC isolates,  
32 bioinformatically selected potential surface-exposed pathovar-specific antigens conserved in more  
33 than 40% of the genomes (n=118), and assembled the representative proteins onto microarrays,  
34 complemented with known or putative colonization factor subunit molecules (n=52), and toxin subunits  
35 to interrogate samples from individuals with acute symptomatic ETEC infections. Surprisingly, in this  
36 open-aperture approach, we found that immune responses were largely constrained to a small number  
37 of antigens including individual colonization factor antigens and EtpA, an extracellular adhesin. In a  
38 Bangladeshi cohort of naturally infected children < 2 years of age, both EtpA and a second  
39 noncanonical antigen, EatA, elicited significant serologic responses that were associated with  
40 protection from symptomatic illness. In addition, children infected with ETEC isolates bearing either  
41 *etpA* or *eatA* genes were significantly more likely to develop symptomatic disease. These studies  
42 support a role for more recently discovered noncanonical antigens in virulence and the development of  
43 adaptive immune responses during ETEC infections, findings that may inform vaccine design efforts to  
44 complement existing approaches.

## 45 Introduction

46 Enterotoxigenic *Escherichia coli* (ETEC) are one of the commonest causes of childhood diarrhea,  
47 accounting for 100s of millions of cases annually (1). This high burden of disease contributes a  
48 substantial risk of increased childhood morbidity and mortality (2), (3, 4). Repeated diarrheal infections,  
49 including those caused by ETEC, lead to the development of growth stunting and environmental  
50 enteropathy, which are life-long consequences of these enteric infections (5). Therefore, preventative  
51 efforts, including vaccination, could have a tremendous impact on global health (6). Despite the lack of  
52 a licensed ETEC vaccine, two important lines of evidence suggest ETEC vaccine development is  
53 feasible. First, controlled human infection models (CHIM) demonstrate that protective immunity  
54 develops following ETEC challenge (7, 8). In addition, the frequency of symptomatic infections in young  
55 children living in endemic regions wanes substantially with age (9, 10), suggesting that natural  
56 infections afford subsequent protection.

57 ETEC biology, and the extraordinary genetic plasticity of *E. coli*, has complicated the  
58 development of a broadly protective vaccine. Canonical approaches have focused primarily on surface  
59 features known as colonization factors (CFs) or CS antigens. However, the structural and antigenic  
60 diversity of these targets has proved challenging (11). Although toxoids that can elicit neutralizing  
61 antibodies against the heat-labile (LT) (12) and heat-stable toxins (ST) (13) that define the ETEC  
62 pathovar are currently under development (14, 15), it is not yet clear whether these alone will afford  
63 sufficient, long-lasting protection.

64 While the ETEC pathovar exhibits high genetic diversity, the recent availability of multiple,  
65 genomic sequences from globally diverse ETEC affords the ability to apply reverse vaccinology  
66 approaches to the identification of conserved, surface-expressed antigens (16, 17). In addition,  
67 microarray-based profiling of immune responses in human volunteers to ETEC challenge has recently  
68 highlighted non-canonical antigens recognized during controlled experimental infection.(7, 18).

69           Application of these approaches to antigen discovery has reinforced the importance of several  
70 surface-expressed molecules common to the ETEC pathovar that are not currently targeted in classical  
71 vaccine approaches(19). These include two novel secreted molecules, the EtpA adhesin(20) and the  
72 EatA(21) autotransporter both originally identified in H10407, an ETEC strain isolated from a case of  
73 severe cholera-like diarrhea in Bangladesh. Recent work demonstrates that both antigens are globally  
74 distributed in the ETEC pathovar and are more highly conserved than the most common CFs(19, 22).  
75 Moreover, they are protective in murine models of infection(23-26) and immunogenic in human  
76 challenge trials(7, 18), suggesting that these molecules could provide additional antigenic targets for  
77 vaccine development. While much is known about EatA and EtpA under experimental conditions, less  
78 is known about their respective roles in natural infections. The present studies were designed to explore  
79 the role of these and other potential noncanonical antigens in shaping the adaptive immune response  
80 to ETEC infection and to examine their contribution to virulence.

81

## 82 **Methods**

### 83 **clinical samples used in this study**

84 Specimens used in these studies were obtained from archived studies on ETEC birth cohort carried out  
85 in Mirpur in Dhaka city (10) as well as other studies (27) The International Centre for Diarrhoeal Disease  
86 Research, Bangladesh ([icddr,b](#)). Frozen ETEC isolates were retrieved from storage (-80°C) and  
87 duplicate vials were shipped to Washington University and subsequent antigen detection.

### 88 **microbial genome analysis and bioinformatic antigen selection**

89 Genomes from 89 clinical ETEC isolates previously collected at icddrb were used to identify conserved  
90 surface proteins. Sequence data for all eighty-nine clinical isolates examined in this study are available  
91 in GenBank (28). Paired-end Illumina sequence data from each isolate were generated *de novo* and  
92 contigs were binned using a previously described protocol (28). The ETEC genomes were compared  
93 using LS-BSR as previously described (29-31). The predicted protein-encoding genes of each genome  
94 that had  $\geq 90\%$  nucleotide identity to each other were assigned to gene clusters using uclust (32).  
95 Representative sequences of each gene cluster were then compared to each genome using TBLASTN  
96 (33) with composition-based adjustment turned off, and the TBLASTN scores were used to generate a  
97 BSR value indicating the detection of each gene cluster in each of the genomes analyzed. The BSR  
98 value was determined by dividing the score of a gene compared to a genome by the score of the gene  
99 compared to its own sequence. The predicted protein function of each gene cluster was determined  
100 using an ergatis-based (34) in-house annotation pipeline (35). A total of 13,835 non-redundant putative  
101 genes (referred to here as 'centroids') were extracted from the eighty-nine genomes.

102 All 13,835 centroids in this study were subjected to a reverse vaccinology pipeline (Institute for Genome  
103 Sciences, Maryland, USA) to identify those features that contained features that suggested they were  
104 surface exposed. An additional subtractive analysis was conducted by filtering centroids (BLASTx and  
105 BLASTn) against the genome contents of six *E. coli* commensal and laboratory strains, yielding 6,444

106 ETEC pathovar-specific centroids. These data were further refined by selecting centroids with a blast  
107 score ratio (BSR)(36)  $\geq 0.8$  (i.e. highly conserved) and present in at least 40% of the clinical isolates,  
108 yielding 316 conserved, virulence-linked genetic features for further analysis. BLASTx was next used to  
109 assign a putative function to these virulence-linked centroids. This analysis was coupled with results  
110 from pSORTv3.0 (37), SubLoc (38), and CELLO (39) to predict subcellular localization, altogether  
111 resulting in the down-selection to 118 potential surface-expressed molecules. These features were  
112 complemented with all known and putative colonization factor subunits (n=52), toxin subunits, and  
113 subdomains of novel antigens for inclusion on the microarrays ([supplemental dataset 1](#)).

#### 114 **microarray production**

115 Antigen-encoding regions selected for the microarrays were amplified by PCR using primers listed in  
116 [supplemental dataset 2](#), and constructed as previously described(7, 18, 40). Recombinant versions of  
117 select antigens including EtpA, EatA, LT-A, LT-B, YghJ, ST-H, and EaeH were also included on the  
118 arrays.

#### 119 **microarray processing**

120 Microarrays were shipped to icddr where they were rehydrated for 10 minutes with 100  $\mu$ l Array  
121 Blocking Buffer. *E. coli* lysate was reconstituted in a final volume of 20% in blocking buffer. Antibody in  
122 Lymphocyte Supernatant (ALS) prepared from blood of ETEC patients were diluted 1:2.5 in the  
123 resuspended lysate followed by loading onto the microarrays and incubated in the dark for 2 hours at  
124 25°C on a rotating platform. Microarrays were then washed 3x with TBS-T (0.05% Tween in TBS, pH  
125 7.5) followed by incubation for 5 minutes in TBS-T at 25°C. This process was repeated once with TBS  
126 followed by a final wash in distilled water. Slides were dried by centrifugation (10 minutes at 500 x g)  
127 then stored in desiccated boxes prior to shipping to the Felgner Laboratory, University of California,  
128 Irvine.

#### 129 **non-canonical antigen ELISA**

130 384 well plates ([Corning, product number 3540](#)) were coated with recombinant EatA passenger domain  
131 (rEatp, 10 micrograms/milliliter in carbonate buffer [15 mM Na<sub>2</sub>CO<sub>3</sub>, 35 mM NaHCO<sub>3</sub>, 0.2g/l NaN<sub>3</sub>, pH  
132 9.6]) or recombinant EtpA (rEtpA, 1 microgram/milliliter in carbonate buffer) and shipped to icddr, b ,  
133 being maintained at 4°C prior to use. The ELISA plates were manually washed three times with PBS-T  
134 (PBS with 0.05% tween) including brief centrifugation for 30 seconds at 200 x g on a tabletop centrifuge  
135 between washes. Plates were rehydrated with 1% BSA in PBS-T overnight at 4°C. The following day,  
136 serum or plasma samples and plates were warmed to ambient temperature (~25°C), serum was diluted  
137 1: 200 in PBS-T with 1%BSA and briefly vortexed. 10 µl of diluted serum was added to the plates,  
138 centrifuged as above, sealed, and incubated at 37°C for 1 hour. After incubation, plates were washed 3  
139 times with PBS-T as described above. 10 µl of HRP-conjugated anti-human IgG (Jackson  
140 ImmunoResearch Laboratories, [Cat 309-035-006](#), West Grove, PA) was diluted 1:2000 in 1% BSA in  
141 PBS-T followed by incubation and washing as above. ELISA plates were read using 10 ul of 3,3',5,5'-  
142 tetramethylbenzidine (TMB) substrate (Seracare, [Cat# 50-76-00](#), Milford, MA) and the Vmax of the  
143 reaction was determined using a BioTek Plate reader with Gen5 Take3 software (v.2.00.18). Due to  
144 variations between ELISA plates, we analyzed data independently for each plate and in combination,  
145 adjusting for age to control for repeated measures.

#### 146 **strain characterization by PCR and immunoblotting**

147 Frozen glycerol stocks of ETEC strains maintained at -80°C were used to inoculate lysogeny broth (LB)  
148 for overnight growth at 37°C, 250 rpm. 1 µl of the overnight culture was diluted in 100 µl of PBS of  
149 which 1 µl was used as the DNA template in initial PCR screening with primers in [supplementary table 1](#).  
150 The thermocycler conditions for *eatA* and *etpA* were denaturation for 5 minutes at 95°C with 30  
151 amplification cycles utilizing 95°C for 30 seconds, 52°C for 30 seconds, and 72°C for 2 minutes. The  
152 toxin multiplex assay (genes *eltB*, *estH*, and *estP*) were conducted as follows; 5 minutes at 95°C with 32  
153 cycles of amplification using 94°C for 15 seconds, 55°C for 15 seconds, and finally 72°C for 30 seconds.

154 Amplicons were visualized as before using a 0.8% agarose gel with ethidium bromide. The H10407  
155 strain (*eatA*, *etpA*, *estH*, *estP*, and *eltB* positive) was used as a positive control in for assays.

156 To adjudicate discordant results PCR was performed using gDNA extraction with the Invitrogen  
157 PureLink Quick Plasmid Miniprep Kit ([Cat# K210010](#), Thermo Fisher, Waltham, MA) Miniprep kit. If  
158 toxin multiplex PCRs were negative, isolates were deemed to have lost their original plasmid during  
159 storage, transportation, or culture passage and subsequently excluded from analysis.

160 Immunoblotting for EatA and EtpA were performed on TCA-precipitated culture supernatants as  
161 previously described (19) using affinity-purified polyclonal rabbit antibodies against the passenger  
162 domain of EatA (21) or EtpA (20) (dilutions 1:1,000 and 1:5,000, respectively) Primary antibodies were  
163 detected using Horseradish Peroxidase (HRP)-conjugated anti-rabbit IgG secondary antibody (1:5,000  
164 dilution, Invitrogen #A16110) for 1 hour at room temperature. HRP was detected with ECL Western  
165 blotting substrate (Bio-Rad, #ABIN412579).

## 166 **statistical analysis**

167 Categorical outcomes were analyzed using chi-square tests, Fisher's exact tests, or age-adjusted  
168 logistic regression analyses as appropriate. Serum data were analyzed using a linear repeated measures  
169 model with a compound symmetry covariance structure. *p*-values < 0.05 were considered significant.

170 Analyses were conducted using SAS version 9.4 (SAS Institute Inc., Cary, NC, USA) or SPSS v.24 (IBM,  
171 Armonk, NY, USA), or GraphPad Prism v9.0.0.

## 172 **Ethics Statement**

173 These studies were approved by the Research Review and Ethical Review Committee of (icddr,b) and  
174 the Institutional Review Board of Washington University School of Medicine in Saint Louis.



175 **Results**

176 **Antibodies following natural infection recognize a finite repertoire of ETEC proteins.**

177 Both human experimental models(7) as well as natural infections(10) demonstrate that prior infection  
178 with ETEC affords substantial protection against symptomatic disease. Elucidation of the nature of  
179 protective adaptive immune responses to these mucosal pathogens can therefore inform vaccine  
180 development. While the majority of earlier ETEC vaccinology efforts have centered on colonization  
181 factor antigens, the present studies were designed to broadly profile antigenic responses and to assess  
182 the role of recently characterized non-canonical antigens. To assess the breadth of immune responses  
183 to ETEC during acute natural infection, we designed protein microarrays containing all known and  
184 putative colonization factor antigen subunits, and additional predicted surface-expressed proteins  
185 conserved in more than 40% of the ETEC pathovar including EtpA and EatA, secreted antigens  
186 expressed by a majority of ETEC strains in a global collection of isolates(19).  
187 Despite the inclusion of multiple candidate surface molecules on the array predicted to be conserved  
188 among strains in Bangladesh from our *in silico* analysis, immune responses following infection were  
189 largely constrained to a small group of antigens including EtpA and EatA ([figure 1A](#)), LT ([supplementary](#)  
190 [figure 1](#)), select colonization factor subunits ([supplementary figure 2](#)) including CssB, one of two  
191 components of the CS6 polymer(41), a predominant immunogenic antigen among strains circulating in  
192 Bangladesh(27). Compared to control specimens obtained outside of the ETEC endemic area, both  
193 EatA and EtpA exhibited high levels of reactivity. Notably, for patients infected with EtpA-expressing  
194 strains, EtpA responses were significantly higher at day 30 following infection than those observed  
195 immediately following admission, whereas the converse was true in patients admitted with EtpA-  
196 negative strains. ([figure 1B](#))

197

198 In an open-aperture assessment of ALS specimens (42, 43) obtained from adults hospitalized at  
199 icddr,b Hospital in Dhaka, Bangladesh or from patients recruited at the Mirpur field site with acute  
200 symptomatic diarrheal illness, we again noted that immune responses following infection were largely  
201 constrained to a relatively small group of antigens including CS6, EtpA and EatA (supplementary  
202 dataset 1). When parsing antigen profiles of the infecting strain, we found that those infected with  
203 EtpA-expressing ETEC exhibited significant increases in both ALS IgA ( $p=0.005$ ), and IgG ( $p=0.02$ )  
204 responses in the week following infection relative to those infected with EtpA-negative strains ([figure](#)  
205 [2](#)). As anticipated, we also observed significant increases in ALS immunoreactivity to the CssB subunit  
206 of CS6 that correlated with the production of CS6 by the infecting strain ([supplementary figure 3](#)).

### 207 **EatA and EtpA are immunogenic in young children.**

208 Data from recent CHIM studies(7, 18) as well as earlier data from patients with natural ETEC  
209 infections(22), indicate that adults develop robust immune responses to non-canonical antigens  
210 including EtpA and EatA. However, in endemic areas young children are the population most severely  
211 impacted by ETEC with incidence declining after 24 months of age, presumably as protection develops  
212 subsequent to infection. Therefore, we examined sera from a cohort of Bangladeshi children followed  
213 from birth through 2 years of age (10) to profile development of antibody responses to EatA and EtpA  
214 over time ([figure 3](#)). During the first month of life, the majority of children were observed to have  
215 elevated IgG responses to both EatA and EtpA, presumably reflecting passive transfer of maternal  
216 antibodies(44). As anticipated, responses to both antigens decreased by three months of age, while  
217 mean responses to each antigen increased significantly through 24 months of age, likely reflecting early  
218 childhood infections with strains expressing EtpA and EatA.

### 219 **Anti-EtpA or EatA responses relative to symptomatic diarrhea.**

220 Immunologic correlates of protection against ETEC are currently unknown(45). The majority of clinical  
221 studies to date have examined the impact of prior infection with strains producing particular

222 colonization factors and/or LT(9) as well as antibody acquisition on subsequent risk of infection with  
223 similar strains(46, 47). We hypothesized that because EtpA and EatA are relatively common antigens in  
224 the ETEC pathovar(19), higher antibody responses to these antigens may be associated with  
225 subsequent protection against symptomatic infection. After excluding antibody responses at one  
226 month of age, we examined the IgG antibody responses to EtpA and EatA preceding detection of ETEC  
227 in either symptomatic or asymptomatic children between four and twenty-four months of age.  
228 Interestingly, we observed elevated responses to both antigens prior to detection of ETEC in  
229 asymptomatic children detection relative to symptomatic cases ([figure 4](#)), perhaps reflecting the  
230 overall mitigating impact of prior exposure on development of diarrheal illness.

231

#### 232 **[etpA relative to blood group A upon first ETEC exposure.](#)**

233 Recent studies have shown that the EtpA adhesin engages host cells via lectin interactions with N-  
234 acetylgalactosamine residues, preferentially when presented as the terminal sugar on blood group A  
235 glycans displayed on intestinal epithelia. Also, when challenged with ETEC H10407, an EtpA-producing  
236 strain, human volunteers of A blood group are more likely to exhibit severe symptomatic illness(48),  
237 recapitulating the observation that symptomatic ETEC infections were more common in children with  
238 blood type A or AB in birth cohort studies of Bangladeshi children(10). We therefore examined this  
239 cohort for potential associations between *etpA*, blood type, and disease status during natural ETEC  
240 infections. In limiting analysis to the first ETEC isolation to avoid confounding effects of repeated  
241 exposures, 41.2% of children that were blood type A or AB had symptomatic diarrhea during their first  
242 ETEC infection ([table 1](#)) compared to 30.6% of those that were blood group B or O (30.6%,  $p = 0.187$ ).  
243 Blood group A or AB individuals were somewhat more likely to have an *etpA* positive strain recovered  
244 from their first infection (74.5% vs. 66.7%,  $OR = 1.462$ , 95%CI 0.693-3.082), although these data were  
245 not statistically significant.

246 **association of *eatA* and *etpA* with virulence.**

247 Although both EatA, a mucin-degrading serine protease, and the EtpA blood group A lectin are  
248 secreted by a diverse population of ETEC strains(19), and contribute to virulence phenotypes *in vitro* as  
249 well as in small animal models of ETEC infection(23, 26, 49, 50), the role played by these antigens in  
250 human infections has yet to be explored in detail. To explore the association of *eatA* and *etpA* with  
251 symptomatic ETEC infection, we examined isolates collected in a birth cohort study in which stools  
252 were collected at monthly intervals in asymptomatic children (asymptomatic colonization) of during  
253 surveillance for diarrhea (symptomatic infection) (10). Notably, the presence of *etpA* or *eatA*  
254 significantly increased the odds of having symptomatic diarrhea (unadjusted odd ratios of 2.1 and 3.1,  
255 respectively ([table 2](#)). Similarly, after adjusting for age we observed significant associations between  
256 the presence of either EtpA (adjusted odds ratio 1.98,  $p=0.007$ ) or EatA (adjusted odds ratio 2.91,  
257  $p<0.001$ ) and development of diarrheal disease.

258 The *eatA* gene (21) and *etpBAC* locus(20) encoding the two-partner secretion system  
259 responsible for EtpA secretion, were originally identified on the p948 plasmid of ETEC strain H10407,  
260 which also encodes the gene for STh (51), and our earlier studies suggested that both loci are more  
261 commonly associated with ST-producing strains (19). Importantly, large epidemiological studies have  
262 demonstrated an association between ST or ST/LT-producing ETEC and more severe disease relative to  
263 LT-only producing ETEC (52, 53). Similarly, we again found an association between ST-producing ETEC  
264 and symptomatic diarrhea, where 59.0% of colonizing ETEC isolates encode STh or STp (*estH* or *estP*  
265 positive) compared to 87.3% of diarrhea-associated isolates (adjusted odds ratio 4.66 [95% CI, 2.62,  
266 8.85,  $p < 0.001$ ]). We therefore asked whether the *eatA* or *etpA* associations with virulence were  
267 independent of ST. The presence of either gene was associated with higher risk of diarrheal illness  
268 independent of ST, although only the presence of *eatA* was significantly associated with illness adjusted  
269 for age. Collectively, however these data suggest that these more recently discovered non-canonical

270 antigens, now frequently referred to as “accessory” virulence factors, could be important contributors  
271 to ETEC disease.

## 272 Discussion

273 ETEC were initially discovered in patients presenting with severe diarrheal illness that mimicked  
274 clinical cholera (54-56). Following seminal discoveries of the heat-labile (LT) and heat-stable (ST) toxins  
275 that define ETEC, and initial characterization of plasmid-encoded colonization factor antigens (CFs), a  
276 canonical approach to vaccine development focused on LT and CFs emerged. However, subsequent  
277 studies have revealed that the molecular pathogenesis of ETEC likely involves a number of other  
278 plasmid as well as chromosomally encoded features that may potentially expand the repertoire of  
279 target “non-canonical” antigens for use in ETEC vaccine development.

280 Among antigens that are unique to the ETEC pathovar are two high molecular weight secreted  
281 proteins, EtpA and EatA. The relative conservation of genes encoding their corresponding secretion  
282 systems within the ETEC pathovar(18, 19), their immunogenicity during natural(57) and experimental  
283 human infection(7, 18), and contribution to virulence *in vitro* and small animal studies have highlighted  
284 their potential utility as vaccine candidates. Nevertheless, our understanding of the importance of  
285 these antigens to ETEC virulence continues to evolve. Recent studies have revealed that the secreted  
286 110 kD passenger domain of the EatA autotransporter protein functions as a mucin-degrading enzyme,  
287 capable of dissolving the MUC2 matrix that covers the surface of enterocytes, the target for ETEC  
288 binding and toxin delivery(23). EtpA, secreted by two-partner secretion mechanism that requires both  
289 the EtpB outer membrane pore and EtpC, a glycosyltransferase(20), functions as an adhesin by bridging  
290 the bacteria(50) and GalNAc-containing host cell glycans present on enterocytes(48). However, despite  
291 an emerging understanding of the function of these molecules, very little is known about their  
292 contribution to disease in human hosts.

293           The present studies extend earlier observations to a cohort of naturally infected children in  
294 Bangladesh(10) and suggest that these non-canonical antigens play critical roles in determining the  
295 outcome of ETEC infections. The finding that genes encoding these antigens are significantly  
296 associated with the development of symptomatic infection may have important implications for the  
297 interpretation of large-scale epidemiologic studies that have employed population attributable fraction  
298 methodology in which ETEC detected in cases of diarrheal illness are compared to asymptotically  
299 colonized controls(58). The present studies would seem to suggest that additional characterization of  
300 ETEC beyond the pathovar-defining heat-labile or heat-stable toxins could be required to accurately  
301 assess the contribution of ETEC to the global burden of diarrheal disease.

302           In general, expanded open-aperture assessment of immune responses to natural ETEC  
303 infections appears to reaffirm earlier observations in human volunteer studies(7). Namely, that there  
304 are relatively few immunogenic targets in the potential repertoire of ETEC surface molecules, with  
305 EtpA and EatA predominating among the pathovar-specific antigens.

306           Although we observed higher IgG serum antibody responses to both EtpA and EatA in children  
307 who were simply colonized with ETEC compared to those with diarrhea, suggesting that these antigens  
308 could afford some protection against symptomatic illness, these findings need to be interpreted  
309 cautiously. Both EtpA and EatA are relatively common antigens among strains circulating in  
310 Bangladesh, therefore the identification of antibodies could simply reflect prior infection that mitigates  
311 infection through responses to other antigens. In addition, correlates of protection for ETEC, as well as  
312 the protective role of serum IgG in enteric infections remain unclear with mucosal IgA responses  
313 considered key to protection (45).

314           Altogether, however the findings reported here suggest that antigens which have not been part  
315 of traditional approaches to vaccine development may play important roles in virulence, and in acquired

316 immunity to ETEC. Further studies will clearly be needed to examine the efficacy of these more  
317 recently discovered antigens as protective immunogens.  
318

319

320 **Acknowledgements**

321 These studies were supported in part by funding from National Institute of Allergy and Infectious  
322 Diseases (NIAID) of the National Institutes of Health (NIH) under Award Numbers R01Al089894,  
323 R01Al126887 (jmf), K23Al30389 (fmk) and The Department of Veterans Affairs I01BX004825 (jmf). The  
324 icddr,b is supported by the Governments of Bangladesh, Canada, Sweden, and the UK. James M.  
325 Fleckenstein is listed the inventor on patent 8323668

326

327



328 figures

329 figure 1

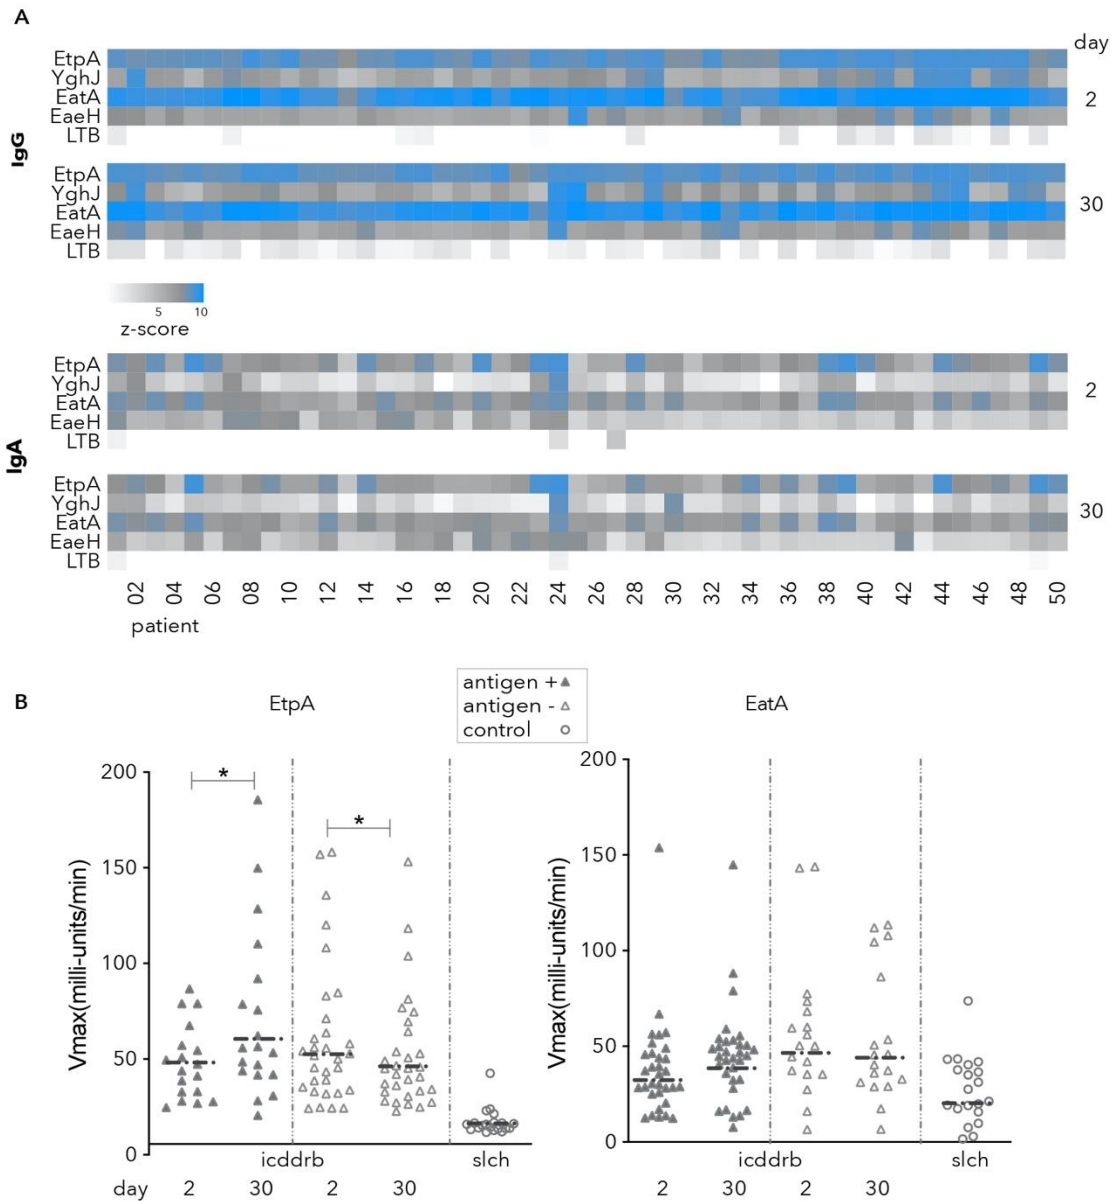

330

331 **Figure 1. serologic response to non-canonical antigens following natural infection**

332 **A.** heatmap indicates log<sub>2</sub> transformed z-score data indicating ETEC protein microarray responses  
333 from day 2, and 30 following presentation to icddrb to four non-canonical antigens EtpA, YghJ, the  
334 passenger domain of EatA, EaeH; and the B-subunit of ETEC heat-labile toxin (LT-B). **B.** kinetic ELISA  
335 responses to EtpA and EatA following infection. Data are segregated by the presence (closed symbols),  
336 or absence (open symbols) of each respective antigen in the strain recovered at presentation. Negative

337 control samples from Saint Louis Children's Hospital (slch) are shown as open circles.  $* < 0.05$  by  
338 Wilcoxon matched-pairs signed rank test.

339

340

341 **figure 2**

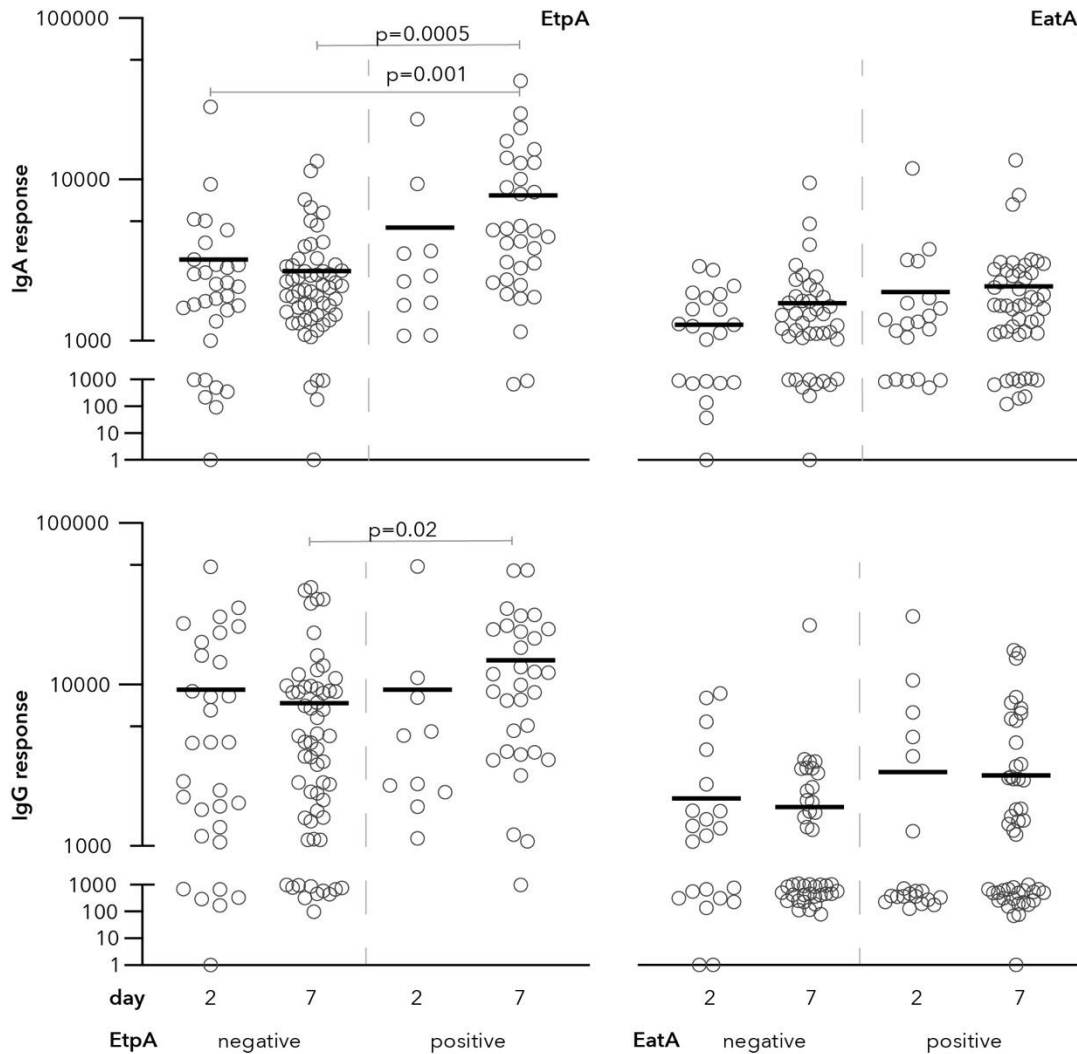

342

343 **Figure 2. ALS responses to EtpA or EatA.** Shown are microarray data for IgA (top panels) and IgG

344 responses to EtpA (left) and the passenger domain of EatA (EatA<sub>p</sub>, right) on days 2, and 7 following

345 hospitalization. Data in each graph are segregated according to antigen expression in the infecting

346 strain (negative or positive). p values reflect Kruskal-Wallis, with post-hoc analysis using Dunn's test

347 adjusted for multiple comparisons for between group analysis.

348

349 **figure 3**

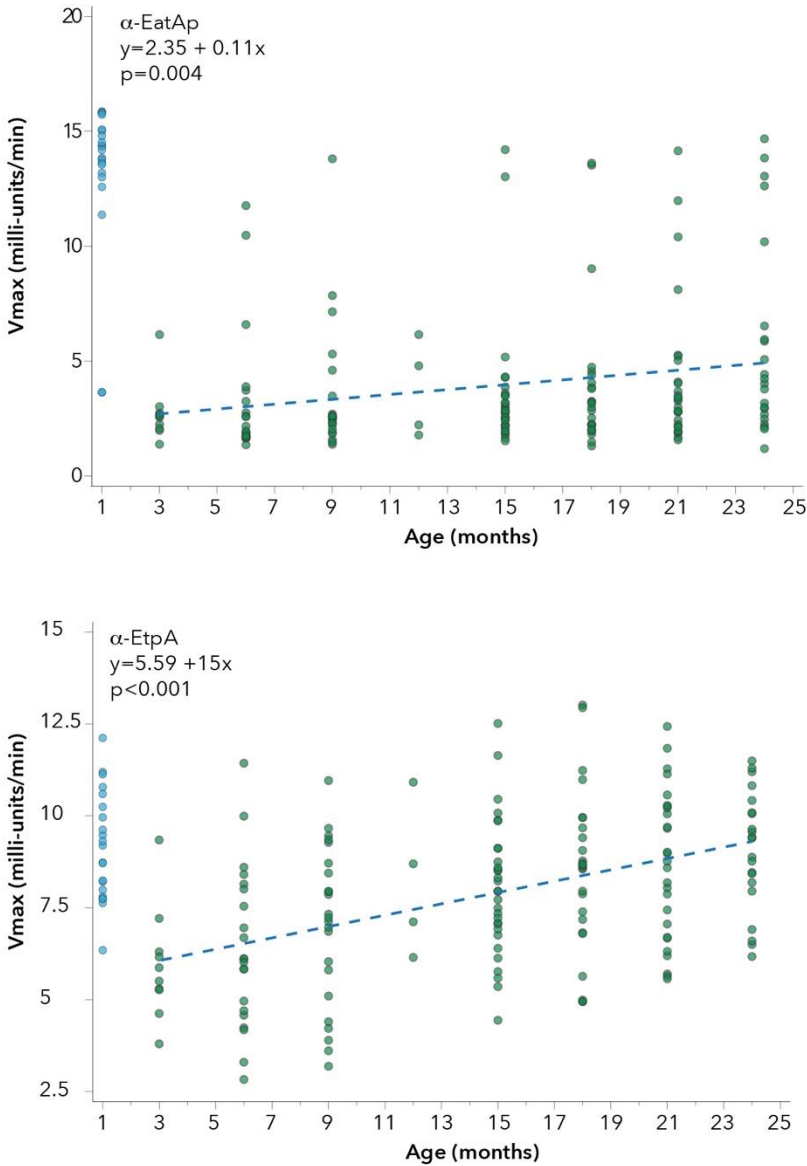

350

351 **Figure 3.** Anti-EtpA or Anti-EatA IgG responses increase with age. Shown are representative kinetic  
352 ELISA data for serum IgG samples obtained from children ages 1-24 months enrolled in a birth cohort  
353 study. Scatter plots of Anti-EtpA and Anti-EatA IgG plotted against data for ages 3-24 months with  
354 regression lines from linear repeated measures models overlaid (dotted line) demonstrate significant

355 increases over time in responses to the passenger domain of EatA (EatA<sub>p</sub>, top) and EtpA (bottom). See

356 Figure S4 for additional plots.

357

358

359

360 **figure 4**

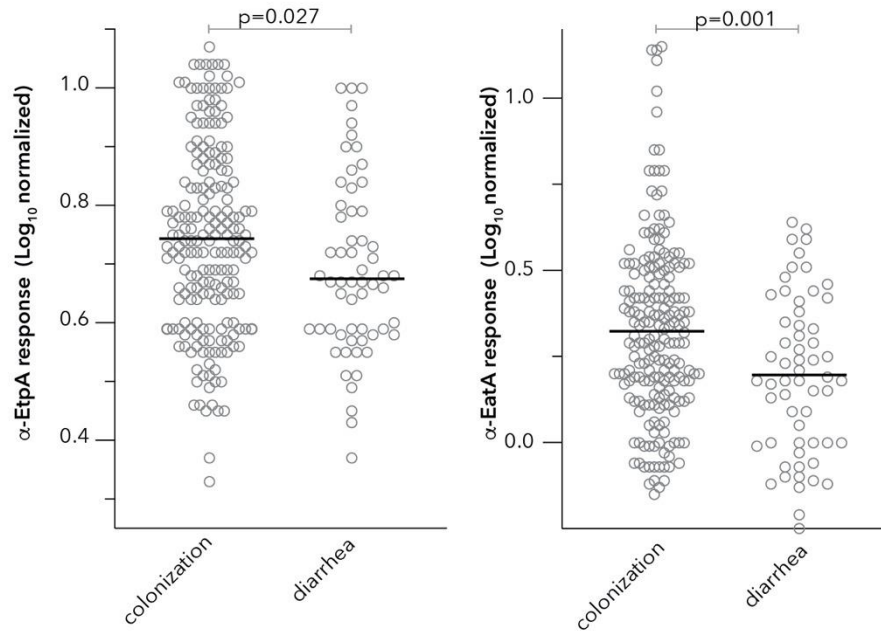

361

362 **Figure 4. Serum IgG responses preceding asymptomatic ETEC colonization and diarrhea.** Shown

363 are peak serum IgG responses for EtpA (left) or the EatA passenger domain (right) preceding either

364 asymptomatic colonization or diarrheal illness with ETEC. Data shown are Log<sub>10</sub> transformed IgG

365 antibody responses determined by kinetic ELISA. Bars represent mean values.

366

367

368 tables

369

370 **table 1. associations of blood group, *etpA* expression and diarrheal disease**

| table 2. association of blood group, <i>etpA</i> , and diarrheal illness                                     |                       |             |                    |                      | 371 |
|--------------------------------------------------------------------------------------------------------------|-----------------------|-------------|--------------------|----------------------|-----|
|                                                                                                              | clinical presentation |             | <i>etpA</i> status |                      | 372 |
|                                                                                                              | asymptomatic          | symptomatic | negative           | positive             |     |
| blood type                                                                                                   | n (%)                 | n (%)       | n (%)              | n (%)                | 373 |
| O or B                                                                                                       | 75 (69.4)             | 33 (30.6)   | 36 (33.3)          | 72 (66.7)            |     |
| A or AB                                                                                                      | 30 (58.8)             | 21 (41.2)   | 13 (25.5)          | 38 (74.5)            | 374 |
|                                                                                                              |                       | p=0.187*    |                    | p=0.317 <sup>†</sup> | 375 |
| * comparison of symptomatic infections in A/AB vs B/O                                                        |                       |             |                    |                      |     |
| <sup>†</sup> comparison of <i>etpA</i> positivity in A/AB vs B/O individuals with first episodes of diarrhea |                       |             |                    |                      | 376 |
| p values determined by chi-square test                                                                       |                       |             |                    |                      |     |

377

non-canonical antigen analysis of Bangladeshi birth cohort samples

|             |          | EtpA antigen status |             | Unadjusted Odds Ratio (95%CI) |         | Age Adjusted Odds Ratio |         |
|-------------|----------|---------------------|-------------|-------------------------------|---------|-------------------------|---------|
| Toxin(s)    | Diarrhea | Negative            | Positive    |                               | p-value |                         | p-value |
| All         | -        | 110 (40.6%)         | 161 (59.4%) | 2.10 (1.28, 3.45)             | 0.003   | 1.98 (1.21, 3.29)       | 0.007   |
|             | +        | 27 (24.5%)          | 83 (75.5%)  |                               |         |                         |         |
| ST or ST/LT | -        | 55 (34.4%)          | 105 (65.6%) | 1.57 (0.89, 2.77)             | 0.116   | 1.51 (0.86, 2.68)       | 0.156   |
|             | +        | 24 (25%)            | 72 (75%)    |                               |         |                         |         |
| LT only     | -        | 55 (49.5%)          | 56 (50.5%)  | 3.60 (0.95, 13.61)            | 0.047   | 2.59 (0.78, 10.79)      | 0.144   |
|             | +        | 3 (21.4%)           | 11 (78.6%)  |                               |         |                         |         |

|             |          | EatA antigen status |             | Unadjusted Odds Ratio (95%CI) |         | Age Adjusted Odds Ratio |         |
|-------------|----------|---------------------|-------------|-------------------------------|---------|-------------------------|---------|
| Toxin(s)    | Diarrhea | Negative            | Positive    |                               | p-value |                         | p-value |
| All         | -        | 152(56.1%)          | 119 (43.9%) | 3.11 (1.93, 5.01)             | <.001   | 2.91 (1.81, 4.75)       | <.001   |
|             | +        | 32 (29.1%)          | 78 (70.9%)  |                               |         |                         |         |
| ST or ST/LT | -        | 67 (41.9%)          | 93 (58.1%)  | 2.05 (1.18, 3.56)             | 0.011   | 1.91 (1.1, 3.38)        | 0.024   |
|             | +        | 25 (26%)            | 71 (74%)    |                               |         |                         |         |
| LT only     | -        | 85 (76.6%)          | 26 (23.4%)  | 3.27 (1.05, 10.18)            | 0.051   | 2.36 (0.74, 7.46)       | 0.142   |
|             | +        | 7 (50%)             | 7 (50%)     |                               |         |                         |         |

p-values for unadjusted odds ratios obtained from simple chi-square or Fisher's exact tests, and p-values for age-adjusted odds ratios obtained from logistic regressions that included age as a covariate.

378 **table 2. relationship of *eatA*, and *etpA*, to symptomatic ETEC.**

379

380

381

382



383 [supplementary data](#)

384 [supplementary figures](#)

385 [supplementary figure 1](#)

386

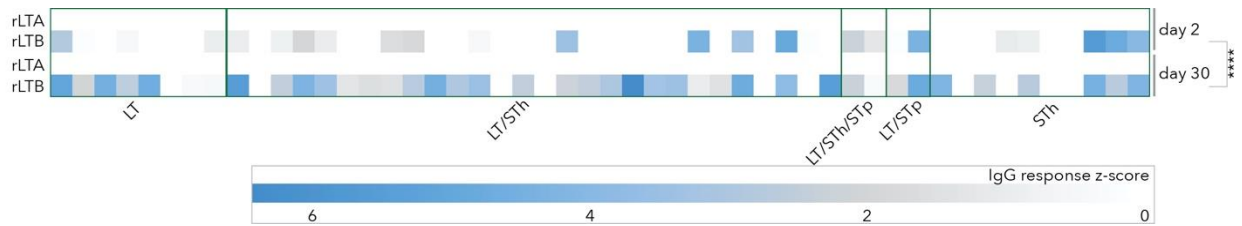

387

388 **supplementary figure 1.** IgG responses to LT subunits LT-A and LT-B following infection. Shown are

389 array z-score data from days 2 and 30 following presentation to icddrb. Data are segregated by the

390 toxin profile of the ETEC strain isolated at presentation. \*\*\*\*= $p < 0.0001$  by Wilcoxon matched pairs

391 comparison of day 2 and day 30 LT-B responses.

392

393 supplementary figure 2

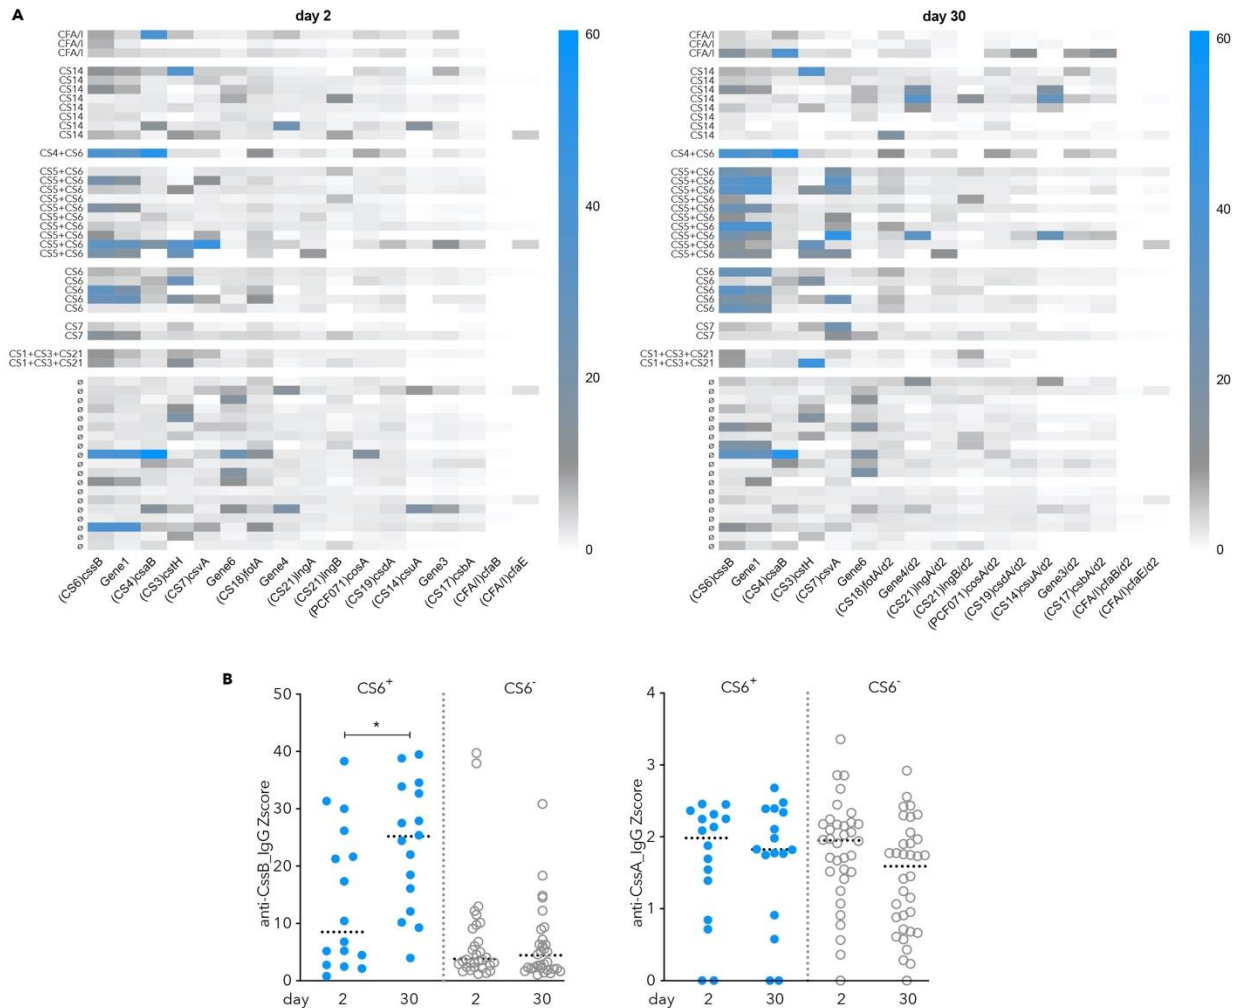

394

395 **supplementary figure 2. (A)** Serum IgG responses to colonization factor subunits following ETEC  
 396 infection, on day 2 and day 30 following presentation to icddr. Shown are normalized zscore data for  
 397 select CF antigens (bottom) printed on the microarrays for 50 individuals infected with ETEC. Antigens  
 398 expressed by the infecting strain for each patient are shown at the left of the heatmap. Responses  
 399 following infection with CS6-expressing strains are outlined in green. **B.** Serologic responses to CsaB  
 400 (left), and CsaA (right) subunits of CS6 following infection. Data are parsed by antigen expression in the  
 401 infecting strain with symbols in blue indicating CS6+ samples. \*p=0.016 by Wilcoxon matched-pairs  
 402 signed rank testing.



404 supplementary figure 3

405

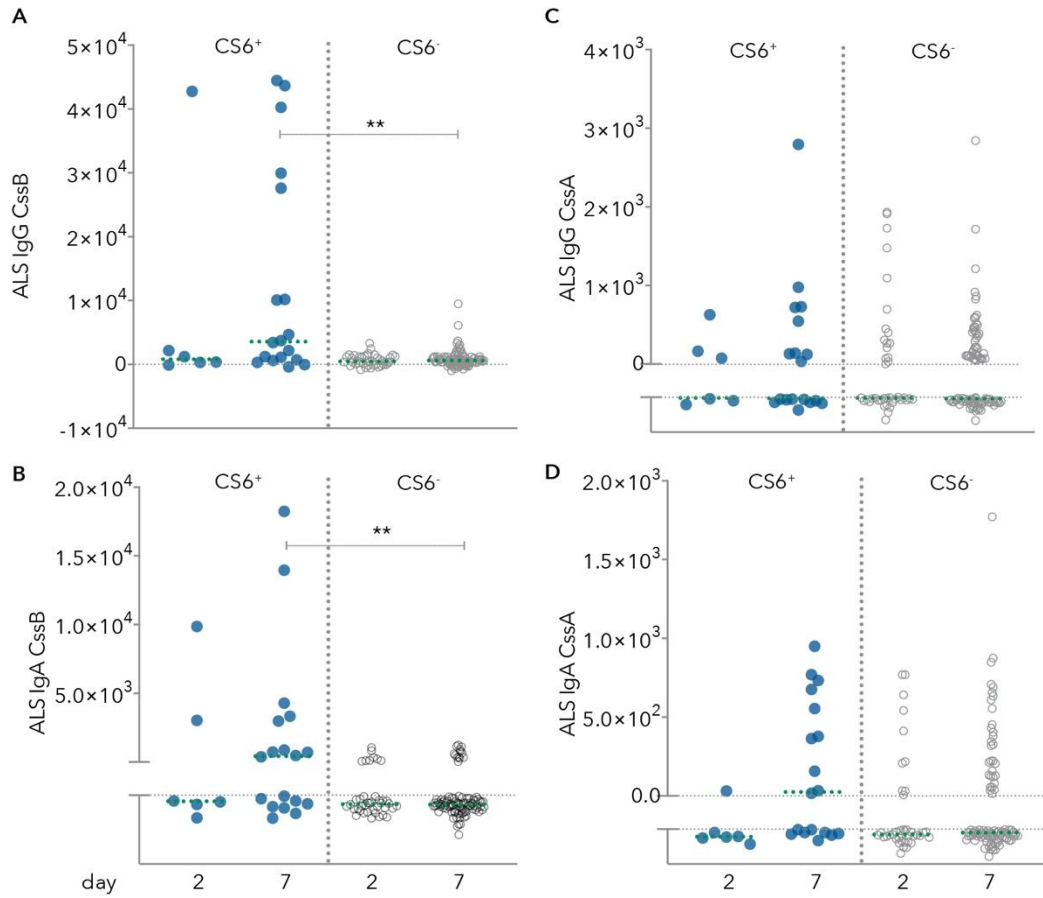

406

407 **supplementary figure 3.** ALS responses to CS6 subunits following ETEC infection. (A) IgG response to

408 CssB. (B) IgA response to CssB. \*\* $p < 0.01$ , Kruskal-Wallis post-hoc analysis using Dunn's test adjusted

409 for multiple comparisons. (C) IgG response to CssA. (D) IgA response to CssA.

410

411 **supplementary tables**

412 **supplementary table 1**

| supplementary table 1. primers used in strain interrogation |                               |                  |                       |              |
|-------------------------------------------------------------|-------------------------------|------------------|-----------------------|--------------|
| gene                                                        | reference sequence<br>GenBank | amplicon<br>(bp) | Sequence (5'>3')      | primer ID    |
| <i>eatA</i>                                                 | <a href="#">AY163491.2</a>    | 1943             | ATGTGCTTTGGCAGGTTAA   | jfo82213.1-F |
|                                                             |                               |                  | ATATCCAGTCAGCACCCACT  | jfo82213.2-R |
| <i>etpA</i>                                                 | <a href="#">AY920525.2</a>    | 999              | GGTTCAGGCAGTATCCAGAC  | jfo82213.3-F |
|                                                             |                               |                  | GGTGTAGCTGTCTGACCACA  | jfo82213.4-R |
| <i>eltB</i>                                                 | <a href="#">CBJ04425.1</a>    | 273              | ACGGCGTTACTATCCTCTC   | jfo92313.3-F |
|                                                             |                               |                  | TGGTCTCGGTCAGATATGTG  | jfo92313.4-R |
| <i>estP</i><br>( <i>sta1</i> )                              | <a href="#">CBJ04435.1</a>    | 166              | TCTTTCCCCTCTTTTAGTCAG | jfo92313.5-F |
|                                                             |                               |                  | ACAGGCAGGATTACAACAAG  | jfo92313.6-R |
| <i>estH</i><br>( <i>sta2</i> )                              | <a href="#">CBJ04483.1</a>    | 64               | TACAAGCAGGATTACAACAC  | jfo92313.7-F |
|                                                             |                               |                  | AGTGGTCCTGAAAGCATG    | jfo92313.8-R |

413

414

415

416

## 417 **References:**

- 418 1. Collaborators GBDDD. 2018. Estimates of the global, regional, and national morbidity, mortality,  
419 and aetiologies of diarrhoea in 195 countries: a systematic analysis for the Global Burden of  
420 Disease Study 2016. *Lancet Infect Dis* 18:1211-1228.
- 421 2. Anderson JDt, Bagamian KH, Muhib F, Amaya MP, Laytner LA, Wierzba T, Rheingans R. 2019.  
422 Burden of enterotoxigenic *Escherichia coli* and shigella non-fatal diarrhoeal infections in 79 low-  
423 income and lower middle-income countries: a modelling analysis. *Lancet Glob Health* 7:e321-  
424 e330.
- 425 3. Hosangadi D, Smith PG, Giersing BK. 2019. Considerations for using ETEC and Shigella disease  
426 burden estimates to guide vaccine development strategy. *Vaccine* 37:7372-7380.
- 427 4. Lanata CF, Black RE. 2018. Estimating the true burden of an enteric pathogen: enterotoxigenic  
428 *Escherichia coli* and *Shigella* spp. *Lancet Infect Dis* 18:1165-1166.
- 429 5. Watanabe K, Petri WA, Jr. 2016. Environmental Enteropathy: Elusive but Significant Subclinical  
430 Abnormalities in Developing Countries. *EBioMedicine* 10:25-32.
- 431 6. Hosangadi D, Smith PG, Kaslow DC, Giersing BK, Who E, Shigella Vaccine Consultation Expert G.  
432 2018. WHO consultation on ETEC and Shigella burden of disease, Geneva, 6-7th April 2017:  
433 Meeting report. *Vaccine* doi:10.1016/j.vaccine.2017.10.011.
- 434 7. Chakraborty S, Randall A, Vickers TJ, Molina D, Harro CD, DeNearing B, Brubaker J, Sack DA,  
435 Bourgeois AL, Felgner PL, Liang X, Mani S, Wenzel H, Townsend RR, Gilmore PE, Darsley MJ,  
436 Rasko DA, Fleckenstein JM. 2018. Human Experimental Challenge With Enterotoxigenic  
437 *Escherichia coli* Elicits Immune Responses to Canonical and Novel Antigens Relevant to Vaccine  
438 Development. *J Infect Dis* 218:1436-1446.
- 439 8. Levine MM, Nalin DR, Hoover DL, Bergquist EJ, Hornick RB, Young CR. 1979. Immunity to  
440 enterotoxigenic *Escherichia coli*. *Infect Immun* 23:729-36.
- 441 9. Steinsland H, Valentiner-Branth P, Gjessing HK, Aaby P, Molbak K, Sommerfelt H. 2003.  
442 Protection from natural infections with enterotoxigenic *Escherichia coli*: longitudinal study.  
443 *Lancet* 362:286-91.
- 444 10. Qadri F, Saha A, Ahmed T, Al Tarique A, Begum YA, Svennerholm AM. 2007. Disease burden due  
445 to enterotoxigenic *Escherichia coli* in the first 2 years of life in an urban community in  
446 Bangladesh. *Infect Immun* 75:3961-8.
- 447 11. Gaastra W, Svennerholm AM. 1996. Colonization factors of human enterotoxigenic *Escherichia*  
448 *coli* (ETEC). *Trends Microbiol* 4:444-52.
- 449 12. Clements JD, Norton EB. 2018. The Mucosal Vaccine Adjuvant LT(R192G/L211A) or dmLT.  
450 *mSphere* 3.
- 451 13. Fleckenstein JM, Kuhlmann FM. 2019. Enterotoxigenic *Escherichia coli* Infections. *Curr Infect Dis*  
452 *Rep* 21:9.
- 453 14. Zegeye ED, Govasli ML, Sommerfelt H, Puntervoll P. 2019. Development of an enterotoxigenic  
454 *Escherichia coli* vaccine based on the heat-stable toxin. *Hum Vaccin Immunother* 15:1379-1388.
- 455 15. Taxt AM, Diaz Y, Aasland R, Clements JD, Nataro JP, Sommerfelt H, Puntervoll P. 2016. Towards  
456 Rational Design of a Toxoid Vaccine against the Heat-Stable Toxin of *Escherichia coli*. *Infect*  
457 *Immun* 84:1239-1249.
- 458 16. Sahl JW, Sistrunk JR, Baby NI, Begum Y, Luo Q, Sheikh A, Qadri F, Fleckenstein JM, Rasko DA.  
459 2017. Insights into enterotoxigenic *Escherichia coli* diversity in Bangladesh utilizing genomic  
460 epidemiology. *Sci Rep* 7:3402.

- 461 17. Mottram L, Chakraborty S, Cox E, Fleckenstein J. 2019. How genomics can be used to understand  
462 host susceptibility to enteric infection, aiding in the development of vaccines and  
463 immunotherapeutic interventions. *Vaccine* doi:10.1016/j.vaccine.2019.01.016.
- 464 18. Chakraborty S, Randall A, Vickers TJ, Molina D, Harro CD, DeNearing B, Brubaker J, Sack DA,  
465 Bourgeois AL, Felgner PL, Liang X, Mani S, Wenzel H, Townsend RR, Gilmore PE, Darsley MJ,  
466 Rasko DA, Fleckenstein JM. 2019. Interrogation of a live-attenuated enterotoxigenic *Escherichia*  
467 *coli* vaccine highlights features unique to wild-type infection. *NPJ Vaccines* 4:37.
- 468 19. Kuhlmann FM, Martin J, Hazen TH, Vickers TJ, Pashos M, Okhuysen PC, Gomez-Duarte OG,  
469 Cebelinski E, Boxrud D, Del Canto F, Vidal R, Qadri F, Mitreva M, Rasko DA, Fleckenstein JM.  
470 2019. Conservation and global distribution of non-canonical antigens in Enterotoxigenic  
471 *Escherichia coli*. *PLoS Negl Trop Dis* 13:e0007825.
- 472 20. Fleckenstein JM, Roy K, Fischer JF, Burkitt M. 2006. Identification of a two-partner secretion  
473 locus of enterotoxigenic *Escherichia coli*. *Infect Immun* 74:2245-58.
- 474 21. Patel SK, Dotson J, Allen KP, Fleckenstein JM. 2004. Identification and molecular characterization  
475 of EatA, an autotransporter protein of enterotoxigenic *Escherichia coli*. *Infect Immun* 72:1786-  
476 94.
- 477 22. Luo Q, Qadri F, Kansal R, Rasko DA, Sheikh A, Fleckenstein JM. 2015. Conservation and  
478 immunogenicity of novel antigens in diverse isolates of enterotoxigenic *Escherichia coli*. *PLoS*  
479 *Negl Trop Dis* 9:e0003446.
- 480 23. Kumar P, Luo Q, Vickers TJ, Sheikh A, Lewis WG, Fleckenstein JM. 2014. EatA, an Immunogenic  
481 Protective Antigen of Enterotoxigenic *Escherichia coli*, Degrades Intestinal Mucin. *Infect Immun*  
482 82:500-8.
- 483 24. Luo Q, Vickers TJ, Fleckenstein JM. 2016. Immunogenicity and Protective Efficacy against  
484 Enterotoxigenic *Escherichia coli* Colonization following Intradermal, Sublingual, or Oral  
485 Vaccination with EtpA Adhesin. *Clin Vaccine Immunol* 23:628-37.
- 486 25. Roy K, Hamilton D, Ostmann MM, Fleckenstein JM. 2009. Vaccination with EtpA glycoprotein or  
487 flagellin protects against colonization with enterotoxigenic *Escherichia coli* in a murine model.  
488 *Vaccine* 27:4601-8.
- 489 26. Roy K, Hamilton D, Allen KP, Randolph MP, Fleckenstein JM. 2008. The EtpA exoprotein of  
490 enterotoxigenic *Escherichia coli* promotes intestinal colonization and is a protective antigen in  
491 an experimental model of murine infection. *Infect Immun* 76:2106-12.
- 492 27. Qadri F, Ahmed T, Ahmed F, Bhuiyan MS, Mostofa MG, Cassels FJ, Helander A, Svennerholm AM.  
493 2007. Mucosal and systemic immune responses in patients with diarrhea due to CS6-expressing  
494 enterotoxigenic *Escherichia coli*. *Infect Immun* 75:2269-74.
- 495 28. Sahl JW, Sistrunk JR, Fraser CM, Hine E, Baby N, Begum Y, Luo Q, Sheikh A, Qadri F, Fleckenstein  
496 JM, Rasko DA. 2015. Examination of the Enterotoxigenic *Escherichia coli* Population Structure  
497 during Human Infection. *MBio* 6.
- 498 29. Sahl JW, Caporaso JG, Rasko DA, Keim P. 2014. The large-scale blast score ratio (LS-BSR)  
499 pipeline: a method to rapidly compare genetic content between bacterial genomes. *PeerJ*  
500 2:e332.
- 501 30. Hazen TH, Sahl JW, Fraser CM, Donnenberg MS, Scheutz F, Rasko DA. 2013. Refining the  
502 pathovar paradigm via phylogenomics of the attaching and effacing *Escherichia coli*. *Proc Natl*  
503 *Acad Sci USA* 110:12810-5.
- 504 31. Sahl JW, Gillece JD, Schupp JM, Waddell VG, Driebe EM, Engelthaler DM, Keim P. 2013.  
505 Evolution of a pathogen: a comparative genomics analysis identifies a genetic pathway to  
506 pathogenesis in *Acinetobacter*. *PLoS One* 8:e54287.
- 507 32. Edgar RC. 2010. Search and clustering orders of magnitude faster than BLAST. *Bioinformatics*  
508 26:2460-1.

- 509 33. Gertz EM, Yu YK, Agarwala R, Schaffer AA, Altschul SF. 2006. Composition-based statistics and  
510 translated nucleotide searches: improving the TBLASTN module of BLAST. *BMC Biol* 4:41.
- 511 34. Orvis J, Crabtree J, Galens K, Gussman A, Inman JM, Lee E, Nampally S, Riley D, Sundaram JP,  
512 Felix V, Whitty B, Mahurkar A, Wortman J, White O, Angiuoli SV. 2010. Ergatis: a web interface  
513 and scalable software system for bioinformatics workflows. *Bioinformatics* 26:1488-92.
- 514 35. Galens K, Orvis J, Daugherty S, Creasy HH, Angiuoli S, White O, Wortman J, Mahurkar A, Giglio  
515 MG. 2011. The IGS standard operating procedure for automated prokaryotic annotation. *Stand*  
516 *Genomic Sci* 4:244-51.
- 517 36. Rasko DA, Myers GS, Ravel J. 2005. Visualization of comparative genomic analyses by BLAST  
518 score ratio. *BMC Bioinformatics* 6:2.
- 519 37. Yu NY, Wagner JR, Laird MR, Melli G, Rey S, Lo R, Dao P, Sahinalp SC, Ester M, Foster LJ,  
520 Brinkman FS. 2010. PSORTb 3.0: improved protein subcellular localization prediction with  
521 refined localization subcategories and predictive capabilities for all prokaryotes. *Bioinformatics*  
522 26:1608-15.
- 523 38. Chen H, Huang N, Sun Z. 2006. SubLoc: a server/client suite for protein subcellular location  
524 based on SOAP. *Bioinformatics* 22:376-7.
- 525 39. Yu CS, Lin CJ, Hwang JK. 2004. Predicting subcellular localization of proteins for Gram-negative  
526 bacteria by support vector machines based on n-peptide compositions. *Protein Sci* 13:1402-6.
- 527 40. Davies DH, Liang X, Hernandez JE, Randall A, Hirst S, Mu Y, Romero KM, Nguyen TT, Kalantari-  
528 Dehaghi M, Crotty S, Baldi P, Villarreal LP, Felgner PL. 2005. Profiling the humoral immune  
529 response to infection by using proteome microarrays: high-throughput vaccine and diagnostic  
530 antigen discovery. *Proc Natl Acad Sci U S A* 102:547-52.
- 531 41. Roy SP, Rahman MM, Yu XD, Tuittila M, Knight SD, Zavialov AV. 2012. Crystal structure of  
532 enterotoxigenic *Escherichia coli* colonization factor CS6 reveals a novel type of functional  
533 assembly. *Mol Microbiol* 86:1100-15.
- 534 42. Chang HS, Sack DA. 2001. Development of a novel in vitro assay (ALS assay) for evaluation of  
535 vaccine-induced antibody secretion from circulating mucosal lymphocytes. *Clin Diagn Lab*  
536 *Immunol* 8:482-8.
- 537 43. Forrest BD. 1988. Identification of an intestinal immune response using peripheral blood  
538 lymphocytes. *Lancet* 1:81-3.
- 539 44. Bhuiyan TR, Saha A, Lundgren A, Qadri F, Svennerholm AM. 2010. Immune responses to  
540 *Helicobacter pylori* infection in Bangladeshi children during their first two years of life and the  
541 association between maternal antibodies and onset of infection. *J Infect Dis* 202:1676-84.
- 542 45. Holmgren J, Parashar UD, Plotkin S, Louis J, Ng SP, Desauziers E, Picot V, Saadatian-Elahi M.  
543 2017. Correlates of protection for enteric vaccines. *Vaccine* 35:3355-3363.
- 544 46. Tobias J, Andersson K, Bialik A, Cohen D. 2008. Preexisting antibodies to homologous  
545 colonization factors and heat-labile toxin in serum, and the risk to develop enterotoxigenic  
546 *Escherichia coli*-associated diarrhea. *Diagn Microbiol Infect Dis* 60:229-31.
- 547 47. Rao MR, Wierzbza TF, Savarino SJ, Abu-Elyazeed R, El-Ghoreb N, Hall ER, Naficy A, Abdel-Messih I,  
548 Frenck RW, Jr., Svennerholm AM, Clemens JD. 2005. Serologic correlates of protection against  
549 enterotoxigenic *Escherichia coli* diarrhea. *J Infect Dis* 191:562-70.
- 550 48. Kumar P, Kuhlmann FM, Chakraborty S, Bourgeois AL, Foulke-Abel J, Tumala B, Vickers TJ, Sack  
551 DA, DeNearing B, Harro CD, Wright WS, Gildersleeve JC, Ciorba MA, Santhanam S, Porter CK,  
552 Gutierrez RL, Prouty MG, Riddle MS, Polino A, Sheikh A, Donowitz M, Fleckenstein JM. 2018.  
553 Enterotoxigenic *Escherichia coli*-blood group A interactions intensify diarrheal severity. *J Clin*  
554 *Invest* 128:3298-3311.



- 555 49. Roy K, Kansal R, Bartels SR, Hamilton DJ, Shaaban S, Fleckenstein JM. 2011. Adhesin degradation  
556 accelerates delivery of heat-labile toxin by enterotoxigenic *Escherichia coli*. *J Biol Chem*  
557 286:29771-9.
- 558 50. Roy K, Hilliard GM, Hamilton DJ, Luo J, Ostmann MM, Fleckenstein JM. 2009. Enterotoxigenic  
559 *Escherichia coli* EtpA mediates adhesion between flagella and host cells. *Nature* 457:594-8.
- 560 51. Crossman LC, Chaudhuri RR, Beatson SA, Wells TJ, Desvaux M, Cunningham AF, Petty NK, Mahon  
561 V, Brinkley C, Hobman JL, Savarino SJ, Turner SM, Pallen MJ, Penn CW, Parkhill J, Turner AK,  
562 Johnson TJ, Thomson NR, Smith SG, Henderson IR. 2010. A commensal gone bad: complete  
563 genome sequence of the prototypical enterotoxigenic *Escherichia coli* strain H10407. *J Bacteriol*  
564 192:5822-31.
- 565 52. Kotloff KL, Nataro JP, Blackwelder WC, Nasrin D, Farag TH, Panchalingam S, Wu Y, Sow SO, Sur D,  
566 Breiman RF, Faruque AS, Zaidi AK, Saha D, Alonso PL, Tamboura B, Sanogo D, Onwuchekwa U,  
567 Manna B, Ramamurthy T, Kanungo S, Ochieng JB, Omore R, Oundo JO, Hossain A, Das SK,  
568 Ahmed S, Qureshi S, Quadri F, Adegbola RA, Antonio M, Hossain MJ, Akinsola A, Mandomando I,  
569 Nhampossa T, Acacio S, Biswas K, O'Reilly CE, Mintz ED, Berkeley LY, Muhsen K, Sommerfelt H,  
570 Robins-Browne RM, Levine MM. 2013. Burden and aetiology of diarrhoeal disease in infants and  
571 young children in developing countries (the Global Enteric Multicenter Study, GEMS): a  
572 prospective, case-control study. *Lancet* 382:209-22.
- 573 53. Platts-Mills JA, Babji S, Bodhidatta L, Gratz J, Haque R, Havt A, McCormick BJ, McGrath M,  
574 Olortegui MP, Samie A, Shakoor S, Mondal D, Lima IF, Hariraju D, Rayamajhi BB, Qureshi S, Kabir  
575 F, Yori PP, Mufamadi B, Amour C, Carreon JD, Richard SA, Lang D, Bessong P, Mduma E, Ahmed  
576 T, Lima AA, Mason CJ, Zaidi AK, Bhutta ZA, Kosek M, Guerrant RL, Gottlieb M, Miller M, Kang G,  
577 Houghton ER, Investigators M-EN. 2015. Pathogen-specific burdens of community diarrhoea in  
578 developing countries: a multisite birth cohort study (MAL-ED). *Lancet Glob Health* 3:e564-75.
- 579 54. De SN, Bhattacharya K, Sarkar JK. 1956. A study of the pathogenicity of strains of *Bacterium coli*  
580 from acute and chronic enteritis. *J Pathol Bacteriol* 71:201-9.
- 581 55. Nalin DR, Bhattacharjee AK, Richardson SH. 1974. Cholera-like toxic effect of culture filtrates of  
582 *Escherichia coli*. *J Infect Dis* 130:595-607.
- 583 56. Sack RB, Gorbach SL, Banwell JG, Jacobs B, Chatterjee BD, Mitra RC. 1971. Enterotoxigenic  
584 *Escherichia coli* isolated from patients with severe cholera-like disease. *J Infect Dis* 123:378-85.
- 585 57. Roy K, Bartels S, Qadri F, Fleckenstein JM. 2010. Enterotoxigenic *Escherichia coli* elicits immune  
586 responses to multiple surface proteins. *Infect Immun* 78:3027-35.
- 587 58. Lanata CF, Black RE. 2018. Estimating the true burden of an enteric pathogen: enterotoxigenic  
588 *Escherichia coli* and *Shigella* spp. *Lancet Infect Dis* doi:10.1016/S1473-3099(18)30546-2.
